# Supplementary material
Source: PubMed Central journal article supplement (PMC4372725)
Supplement: NIHMS665528-supplement-supplement_1.pdf [file NIHMS665528-supplement-supplement_1.pdf]

Supplement 1. *Quantification of transcripts of AMACR, PCA3 in urinary sediments by qPCR*

| No: | CaP specimens |           |        |       | Non-CaP specimens |           |       |       |
|-----|---------------|-----------|--------|-------|-------------------|-----------|-------|-------|
|     | Sample ID     | Serum PSA | PCA3   | AMACR | Sample ID         | Serum PSA | PCA3  | AMACR |
| 1   | 1004          | 9.8       | 580.0  | 420.3 | 1003              | 2.2       | 42.3  | 5.5   |
| 2   | 1005          | 4.5       | 43.1   | 35.8  | 1008              | 3         | 0.5   | 13.3  |
| 3   | 1006          | 8.4       | 49.9   | 12.5  | 1010              | 2.2       | 19.2  | 3.6   |
| 4   | 1007          | 4.4       | 36.0   | 86.2  | 1011              | 0.6       | 66.6  | 24.7  |
| 5   | 1012          | 48.7      | 0.1    | 11.0  | 1015              | 7.7       | 14.7  | 3.0   |
| 6   | 1013          | 4.5       | 18.3   | 1.2   | 1016              | 5.2       | 10.6  | 9.1   |
| 7   | 1014          | 4.3       | 1162.4 | 346.9 | 1017              | 5.2       | 1.0   | 2.5   |
| 8   | 1019          | 3.3       | 55.7   | 33.9  | 1023              | 6.8       | 9.4   | 72.0  |
| 9   | 1021          | 6.4       | 73.1   | 209.8 | 1026              | 6.8       | 1.0   | 0.3   |
| 10  | 1022          | 9.4       | 10.6   | 37.4  | 1027              | 5.2       | 31.7  | 1.5   |
| 11  | 1024          | 6.4       | 245.1  | 171.8 | 1028              | 5.9       | 16.9  | 3.4   |
| 12  | 1025          | 6.8       | 82.8   | 58.7  | 1029              | 2.5       | 61.6  | 9.4   |
| 13  | 1031          | 5.6       | 19.9   | 12.4  | 1032              | 1         | 72.3  | 9.3   |
| 14  | 1035          | 4.5       | 53.6   | 11.5  | 1033              | 2.8       | 25.3  | 6.0   |
| 15  | 1038          | 0.3       | 38.8   | 42.4  | 1036              | 6         | 37.0  | 2.6   |
| 16  | 1041          | 4         | 25.5   | 1.4   | 1037              | 3.6       | 27.6  | 47.0  |
| 17  | 1042          | 4.2       | 21.6   | 2.6   | 1039              | 5.9       | 12.6  | 5.5   |
| 18  | 1044          | 111       | 25.6   | 1.6   | 1040              | 8.4       | 14.9  | 7.0   |
| 19  | 1045          | 0.5       | 69.5   | 1.7   | 1043              | 4.4       | 8.2   | 6.7   |
| 20  | 1046          | 0.7       | 20.9   | 1.3   | 1050              | 0.8       | 7.8   | 14.1  |
| 21  | 1048          | 4.9       | 26.9   | 17.7  | 1051              | 8         | 6.4   | 1.6   |
| 22  | 1049          | 4.3       | 6.5    | 2.4   | 1052              | 3.5       | 29.7  | 22.8  |
| 23  | 1055          | 1.4       | 96.2   | 23.7  | 1053              | 4.9       | 8.0   | 2.5   |
| 24  | 1057          | 6.4       | 44.8   | 12.7  | 1056              | 1.1       | 74.6  | 22.9  |
| 25  | 1062          | 6.3       | 102.4  | 14.0  | 1059              | 4.2       | 46.4  | 4.7   |
| 26  | 1064          | 4.3       | 5.6    | 1.4   | 1060              | 6.4       | 31.2  | 59.4  |
| 27  | 1070          | 4.91      | 14.4   | 2.0   | 1061              | 0.6       | 3.4   | 7.6   |
| 28  | 1073          | 2.9       | 9.9    | 1.6   | 1063              | 3.9       | 90.5  | 5.2   |
| 29  | 1074          | 4.8       | 20.3   | 13.9  | 1066              | 0.8       | 0.4   | 0.6   |
| 30  | 1075          | 6         | 149.8  | 15.4  | 1067              | 4.7       | 0.0   | 24.4  |
| 31  | 1081          | 2.9       | 78.4   | 12.6  | 1068              | 5.7       | 1.4   | 1.1   |
| 32  | 1083          | 7.8       | 63.0   | 10.8  | 1069              | 4.7       | 0.1   | 1.0   |
| 33  | 1093          | 20        | 2027.7 | 10.7  | 1071              | 7.6       | 122.2 | 25.4  |
| 34  | 1094          | 7.6       | 1.0    | 12.3  | 1072              | 2.8       | 7.5   | 3.4   |
| 35  | 1095          | 11.6      | 38.6   | 35.0  | 1076              | 3.3       | 129.0 | 14.9  |
| 36  | 1096          | 7.2       | 5.8    | 2.1   | 1077              | 1.3       | 21.4  | 3.4   |
| 37  | 1099          | 8.6       | 148.2  | 36.6  | 1078              | 6         | 15.3  | 20.0  |
| 38  | 1100          | 3.9       | 50.8   | 13.0  | 1080              | 7.98      | 3.3   | 0.6   |
| 39  | 1102          | 4.6       | 8.2    | 3.1   | 1086              | 3         | 52.7  | 3.1   |
| 40  | 1105          | 5         | 2.5    | 1.6   | 1087              | 6.89      | 158.8 | 2.6   |
| 41  | 1106          | 3.1       | 6.1    | 23.9  | 1088              | 2.3       | 17.2  | 35.6  |
| 42  | 1107          | 5.8       | 37.5   | 13.8  | 1089              | 5.4       | 4.8   | 0.5   |
| 43  | 1111          | 0.1       | 412.3  | 150.2 | 1090              | 9.4       | 44.8  | 7.7   |
| 44  |               |           |        |       | 1103              | 12.4      | 0.5   | 0.5   |
| 45  |               |           |        |       | 1104              | 4.9       | 0.9   | 0.6   |
| 46  |               |           |        |       | 1108              | 3.2       | 154.1 | 14.9  |
| 47  |               |           |        |       | 1110              | 5.8       | 0.5   | 3.6   |
| 48  |               |           |        |       | 1112              | 3         | 14.2  | 2.9   |
| 49  |               |           |        |       | 1113              | 3.6       | 2.7   | 1.8   |

Note: Scores for PCA3 and AMACR in opposite to the cutoff point are shaded.

Supplement 2. *Sensitivity and specificity of biomarker assays in different age groups*

| Age group (years) | PCA3 mRNA score<br>% (95% CI) |             | AMACR mRNA score<br>% (95% CI) |             | Serum PSA level<br>% (95% CI) |             |
|-------------------|-------------------------------|-------------|--------------------------------|-------------|-------------------------------|-------------|
|                   | Sensitivity                   | Specificity | Sensitivity                    | Specificity | Sensitivity                   | Specificity |
| ≤59               | 64 (35-92)                    | 61 (41-81)  | 64 (35-92)                     | 74 (56-92)  | 82 (59-100)                   | 57 (36-77)  |
| 60-69             | 73 (46-99)                    | 57 (36-78)  | 64 (35-92)                     | 76 (58-94)  | 64 (35-92)                    | 29 (16-41)  |
| ≥70               | 76 (58-94)                    | 60 (17-100) | 76 (58-94)                     | 40 (0-83)   | 76 (58-94)                    | 40 (0-83)   |
| All ages          | 72 (59-85)                    | 59 (45-73)  | 70 (56-83)                     | 71 (59-84)  | 77 (64-89)                    | 45 (31-59)  |
